1 Concurrent infection of human brain with multiple species of Lyme disease spirochetes.

2 Maryna Golovchenko<sup>a\*</sup>, Jakub Opelka<sup>b,c</sup>, Marie Vancova<sup>a,c</sup>, Hana Sehadova<sup>b,c</sup>, Veronika

3 Kraliková<sup>d</sup>, Martin Dobias<sup>d</sup>, Milan Raska<sup>e</sup>, Michal Krupka<sup>f</sup>, Kristyna Sloupenská<sup>f</sup>, Natalie

4 Rudenko<sup>a\*#</sup>

5 a - Biology Centre Czech Academy of Sciences, Institute of Parasitology, Ceske Budejovice,

6 Czech Republic

7 b - Biology Centre Czech Academy of Sciences, Institute of Entomology, Ceske Budejovice,

8 Czech Republic

9 c – Faculty of Sciences, University of South Bohemia, Ceske Budejovice, Czech Republic

10 d - Institute of Forensic Medicine and Medical Law, University Hospital Olomouc, Olomouc,

11 Czech Republic.

12 e - Department of Immunology, University Hospital Olomouc, Olomouc, Czech Republic

13 f - Department of Immunology, Faculty of Medicine and Dentistry, Palacky University

14 Olomouc, Olomouc, Czech Republic

15

16 Running title: *Borrelia* in human brain

17 #Address correspondence to Natalie Rudenko, [natasha@paru.cas.cz](mailto:natasha@paru.cas.cz)

18

19 \*Maryna Golovchenko and Natalie Rudenko contributed equally to this work.

20

## 21 **Abstract**

22 Lyme disease (LD) spirochetes are well known to be able to disseminate into the tissues of infected  
23 hosts, including humans. The diverse strategies used by spirochetes to avoid the host immune  
24 system and persist in the host include active immune suppression, induction of immune tolerance,  
25 phase and antigenic variation, intracellular seclusion, and, importantly, incursion into immune  
26 privileged sites such as the brain. Invasion of immune privileged sites, like the brain allows the  
27 spirochetes not only escape from the host immune system but also can reduce the efficacy of  
28 antibiotic therapy.

29 Here we present a case of the detection of DNA of spirochetes from *Borrelia burgdorferi* sensu  
30 lato complex from multiple loci of LD patient's post-mortem brain. The presence of co-infection  
31 with *Borrelia burgdorferi* sensu stricto and *Borrelia garinii* in LD patient's brain was confirmed  
32 by PCR. The presence of atypical spirochete morphology was confirmed by  
33 immunohistochemistry of the brain samples and also in tissues of experimental mice, infected with  
34 *Borrelia* by simultaneous injection of spirochetes subcutaneously and intraperitoneally. Even  
35 though both spirochete species were simultaneously present in brain, the brain regions where the  
36 two species were detected were different and non-overlapping.

## 37 **Introduction**

38 Lyme disease (LD) is a multi-system disorder with a diverse spectrum of clinical manifestations.  
39 It is caused by spirochetes of the *Borrelia burgdorferi* sensu lato (s. l.) complex. The initial stage  
40 of infection is characterized by flu-like symptoms (malaise, fatigue, headache, arthralgias,  
41 myalgias, fever, and regional lymphadenopathy) and/or, sometimes, skin rash (various forms of  
42 erythema migrans) developing within a few weeks after the tick bites. If the causative agent is not  
43 eliminated, it will further disseminate to the secondary sites of infection, leading to multiple

44 subacute and persistent inflammatory pathologies, particularly affecting the central nervous  
45 system (CNS), joints or heart (1). Symptoms of the secondary stage of infection vary and may  
46 disappear after days to months, or continue, as the disease transition to the late stage of persistent  
47 disease with various signs and symptoms including fatigue, sleep disruption, cognitive deficits,  
48 arthralgia, myalgia, and headache. Even though antibiotic treatments in vast majority of infected  
49 patients result in full recovery, some patients suffer from long lasting neurological and  
50 psychological manifestations. Antibiotic therapy at late stage disease exhibits unpredictable  
51 response in resolution of symptoms (2-5).

52 For those who received standard antibiotic treatment, problems persisting more than six months  
53 after antibiotic treatment are termed, sometime, Post-Treatment Lyme Disease Syndrome  
54 (PTLDS) (6). The etiology of these syndromes is unknown, but several hypotheses have been  
55 discussed: *Borrelia* persistence, induction of immune disbalance leading to inflammation or  
56 autoimmunity, or disrupted central neural pathways leading to central sensitization, among others.  
57 Whether it depends on or is independent of microbial persistence it remains a topic of debate (7-  
58 8), however, the ability of LD spirochetes to colonize the multiple host tissues has been confirmed  
59 (9). Dermis is the first tissue that spirochetes colonize after the tick bite. At this point host immune  
60 system controls the pathogen burden in the tissue (10). Colonization of distant tissues involves the  
61 spirochete dissemination from the dermis, which is mediated by differential regulation of virulence  
62 determinants of *Borrelia* (11), that support the migration of pathogens through the endothelial and  
63 blood-brain barriers (12). Once established in immune privileged site, the pathogen is capable of  
64 triggering the local inflammation but is safe from being cleared by the host immune system and  
65 antibiotics, that can't penetrate the blood-brain barrier (13). Survival of spirochetes despite

66 antibiotic treatments, leading to the establishment of chronic LD has been clearly shown in animal  
67 studies (2, 14-17).

68 More spirochete species from *Borrelia burgdorferi* sensu lato complex are responsible for LD in  
69 Europe than in North America (18). The main burden of human cases, approximately 60%, is  
70 linked to *Borrelia afzelii*. The most common manifestation of *B. afzelii* infection is a skin lesion,  
71 erythema migrans (19). The second, most represented European *Borrelia* genospecies, *Borrelia*  
72 *garinii*, causes the Lyme neuroborreliosis (LNB), affecting both the central and peripheral nervous  
73 system (20) and up to 15% of LD patients suffer of LNB (13, 20). Intracellular localization of LD  
74 spirochetes in neurons and glial cells have been confirmed both, *in vitro* and *in vivo* (7, 21-22).  
75 Evidence of *Borrelia* persistence in the brains of chronic LNB patients is very limited;  
76 nevertheless, the development of dementia, cortical atrophy or amyloid deposition in some cases  
77 has been confirmed (7, 21). Invading neurons and glial cells, LD spirochetes can trigger  
78 progressive cell death or cause cell dysfunction (23). *Borrelia burgdorferi* sensu stricto (s.s.), is  
79 the major cause of LD in North America, however, its impact in European LD is under-appreciated  
80 (24-25). The most frequent manifestation of *B. burgdorferi* s.s. induced neuroborreliosis in the  
81 United States is lymphocytic meningitis whereas European *B. garinii* – induced LNB, in the  
82 majority of cases, is diagnosed as subacute painful meningoradiculitis or cranial nerve palsy, a  
83 uncommon manifestation of LNB in the USA (26). Such differences in clinical manifestations of  
84 LNB, caused by different spirochete species might be based on different mechanisms of  
85 dissemination of the bacterial pathogen into the nervous system, different capabilities of individual  
86 species to cross the blood-brain barrier (BBB) by either by transcellular or paracellular penetration  
87 (27), or different diagnostic protocols. Until recently, no reliable system for the detection of  
88 persistent infection exists. A single study on non-human primates showed that persistent forms of

89 spirochetes that survived antibiotic treatment remain metabolically active (28). Because access to  
90 samples for study the persistence in humans is extremely difficult, studies rely either on findings  
91 generated in the animal studies or on analysis of post-mortem human originated specimens.

92 Here we report the case of the patient who, after being infected by *Borrelia* and treated with  
93 antibiotics continuously, progressed toward neurologic/psychiatric symptoms within the  
94 subsequent 13 years. After this period the patient underwent repeated serological testing with  
95 borderline positivity for *Borrelia* infection followed by prescription of several antibiotics, which  
96 provided no clinical improvements, followed by hospitalization at psychiatric clinics. Several  
97 months after releasing from the clinic, the patient committed suicide providing written consent for  
98 analyzing his brain for *Borrelia* presence.

## 99 **Materials and methods**

### 100 ***Ethical statement***

101 Samples that were analyzed in this study originate from a young adult male who committed suicide  
102 in August 2019. The processing of post-mortem samples was performed based on informed  
103 consent provided by him before suicide in the form of a letter which was accepted by the Ethical  
104 Committee of University Hospital Olomouc, 102/18 (NV19-05-00191).

### 105 ***CSF and blood collection and analysis***

106 The autopsy was performed at the Institute of Forensic Medicine and Medical Law University  
107 Hospital Olomouc and Faculty of Medicine and Dentistry, Palacky University Olomouc, Czech  
108 Republic two days after the suicide. Peripheral blood and cerebrospinal fluid (CSF) samples were  
109 collected in a volume of 2 ml. The CSF was markedly stained by the presence of blood. Part of the  
110 CSF was aseptically removed for cultivation of spirochetes ( Supplementary Materials and  
111 Methods). The remaining volume of CSF was centrifuged (2.000xg, 10 min, 4°C) to remove cells,

112 and the supernatant was collected and stored at -80°C. The blood was centrifuged (2.000xg, 10  
113 min, 4°C), clarified serum was collected, transferred to a new tube and stored at -80°C. Serological  
114 tests were performed by standard protocols using Anti-Borrelia EUROLINE-RN-AT, EUROLINE  
115 Autoimmune Inflammatory Myopathies 16 Ag (IgG) and EUROLINE ANA Profile 3 plus DSF70  
116 (IgG) (EUROIMMUN, Luebeck, Germany) blot diagnostic kit with evaluation by a flatbed  
117 scanner and software EUROLineScan Software 3.4 (EUROIMMUN, Lübeck, Germany).

#### 118 ***Brain tissue collection (post-mortem)***

119 Brain tissue samples of about 9 cm<sup>3</sup> from seven different parts of the suicides' brain were collected  
120 post-mortem by a certified pathologists in the Institute of Forensic Medicine and Medical Law,  
121 University Hospital Olomouc. Brain samples were collected from: 1 - temporal lobe (right), 2 –  
122 choroid plexus (left), 3 - occipital lobe (left), 4 - frontal lobe (left), 5 - parietal lobe (right), 6 -  
123 basal ganglia (right), and 7 - cerebellum (right). All tissue samples were divided into three parts.  
124 One part, that was used for cultivation of potentially live spirochetes. This sample was immediately  
125 aseptically transferred to BSK medium supplemented with 6% rabbit serum and antibiotics (as  
126 described above). The second part was used for PCR analyses. This portion was frozen at -80°C  
127 until use. The third part, that was used for immunohistochemical analyses. This part was fixed in  
128 10% buffered formalin (4% paraformaldehyde) and stored at 4°C.

129 Based on PCR results, 5 samples of 125 mm<sup>3</sup> in size were subsequently taken from the fixed  
130 autopsied occipital lobe sample for immunohistochemical staining (for the sample position within  
131 the occipital lobe autopsy is shown in Figure 1.

#### 132 ***Analysis of total DNA from human brain tissues: polymerase chain reactions (PCR)***

133 The DNA purification steps (Supplementary Material and Methods), PCR and post-amplification  
134 analyses were all performed in separate areas with all precautions against contamination. The

135 presence of *Borrelia burgdorferi* s. l. DNA in the samples was assessed by PCR amplification of  
136 partial genes encoding outer surface protein C (OspC) and flagellin, followed by amplification of  
137 8 housekeeping genes according to the previously described MLST protocol (29). To reduce the  
138 inhibition of the reaction from the excess of human DNA in the template DNA, the PCR reactions  
139 were conducted as nested PCRs under conditions previously used with human samples (30-31).  
140 The partial *ospC* and *flagellin* genes were amplified by nested PCR using the previously described  
141 primers (Supplementary Table S1) and conditions of the reaction as follows: 30 cycles of  
142 denaturation 95°C for 30 sec, annealing 50°C and 52°C for 30 sec for the external and internal  
143 round of PCR respectively, and extension 72°C for 30 sec (32-33). Two steps amplification of  
144 eight housekeeping genes included: *clpA* (BB0369), *clpX* (BB0612), *pyrG* (BB0575), *uvrA*  
145 (BB0837), *pepX* (BB0627), *recG* (BB0581), *rplB* (BB0481, seminested PCR), and *nifS* (BB0084,  
146 seminested PCR) (Supplementary Table S1). The PCR conditions for the housekeeping genes,  
147 except for *recG*, were as follows: initial denaturation 95°C for 15 min, cyclic denaturation 94°C  
148 for 30 sec, annealing temperature from 55°C to 48°C, (touchdown PCR, decreasing 1°C each  
149 cycle) for 30 sec, and the extension step of 72°C for 60 sec. An additional 20 cycles were run using  
150 denaturation temperature 94°C for 30 sec, annealing temperature of 48°C for 30 sec, and extension  
151 at 72°C for 60 sec. After a final extension step at 72 °C for 5 min, the samples were kept at 14°C  
152 until the second (nested) PCR. The conditions for the second PCR was as follows: 95°C for 7 min,  
153 followed by 35 cycles of [denaturation 94°C for 30 sec, annealing 50°C for 30 sec, extension 72°C  
154 for 60 sec]. After a final extension step for 5 min at 72°C, the samples were kept at 14°C.  
155 For *recG*, the PCR conditions for the first set of cycles consists of initial denaturation 95°C for 15  
156 min, followed by 30 cycles of denaturation at 94°C for 30 sec, annealing 55°C for 30 sec, extension

157 72°C for 60 sec, and final extension at 72°C for 5 min. The conditions for the second set of cycles  
158 were identical for all primers used.

159 The PCR reactions were carried out in a final volume of 20 µl using 2x HotStarTaq Plus Master  
160 Mix (Qiagen). Amplicons were visualized by electrophoresis in a 1.5 % agarose gel (1 × TAE, pH  
161 8.0). In all cases, a reaction mix with water instead of a DNA template was used as the negative  
162 control. *Borrelia carolinensis* DNA was used as a positive control in all PCR reactions.

163 ***Immunohistochemical detection of Borrelia in paraplast section of human brain autopsy and***  
164 ***infected mouse tissues***

165 Mice were infected with *B. burgdorferi* s.s. administered simultaneously by intradermal and  
166 intraperitoneal routes (Supplementary Material and Methods) . The fixed autopsied occipital lobe  
167 samples were washed several times in phosphate-buffered saline (PBS). Organs dissected from  
168 euthanized mice were submersed in a fixative of saturated picric acid, 4% formaldehyde and 2.3%  
169 of copper acetate supplemented with mercuric chloride (Bouin-Hollande solution) (34) overnight  
170 at 4 °C. The fixative was then thoroughly washed with 70% ethanol. Standard techniques were  
171 used for both human autopsies and mouse tissue samples including, dehydration, embedding in  
172 paraplast, sectioning to 10 µm, deparaffinization and rehydration. The sections were treated with  
173 Lugol's iodine followed by 7.5% solution of sodium thiosulphate to remove residuals of heavy  
174 metal ions, and then washed in distilled water and PBS supplemented with 0.3% Tween 20 (PBS-  
175 Tw). The nonspecific binding sites were blocked with 5% normal goat serum in PBS-Tw (blocking  
176 solution) for 30 min at room temperature (RT). Incubation with rabbit polyclonal *B. burgdorferi*  
177 antibody (Invitrogen, USA, specific to pool of *B. burgdorferi* s. l. complex proteins) diluted 1:200  
178 in the blocking solution was done in a humidified chamber overnight at 4°C followed by washing  
179 the samples by thorough rinsing with PBS-Tw (three times for 10 min at RT). For enzymatic



180 staining, the sections were further incubated in the cross-adsorbed horseradish peroxidase-labeled  
181 goat anti-rabbit secondary antibody (Invitrogen, USA) diluted 1:500 in the blocking solution for  
182 90 minutes in RT, washed in PBS-Tw (three times for 10 min at RT), in 0.05M Tris-HCl pH 7.5  
183 (for 10 min at RT) and stained in 10% 3,3' diaminobenzidine in 0.05M Tris-HCl pH 7.5 with  
184 0.005% H<sub>2</sub>O<sub>2</sub> for 10 min in RT. The reaction was stopped by rinsing in distilled water, dehydrated  
185 and mounted in DPX mounting medium (Fluka, Switzerland). The samples were investigated  
186 under BX51 microscope equipped with DP80 CCD camera and cellSens software (Olympus,  
187 Tokyo, Japan) and the images were reconstructed by stitching of several Z stacks series. The  
188 further 3D image analyzes were performed in FIJI ImageJ software (35) using Iterative  
189 Deconvolution 3D plugin.

190 For fluorescence staining, the samples treated with primary antibody and washed in PBS-Tw were  
191 incubated with goat anti-rabbit IgG conjugated Alexa Fluor 488 (Life Technologies, USA) diluted  
192 1:500 in the blocking solution for 90 minutes in RT followed by rinsing with PBS-Tw (three times  
193 for 10 min at RT in the dark). The samples were dehydrated and mounted in DPX mounting  
194 medium (Fluka, Switzerland). The fluorescence signal was examined under the laser scanning  
195 confocal microscope FLUOVIEW™ FV3000 (Olympus, Japan) using the IMARIS software  
196 (Oxford Instrument, UK) for 3D reconstruction of the Z-stack series. Due to the autofluorescence  
197 of human brain autopsy samples, enzymatic detection of bound primary antibodies was  
198 preferentially used for the detection of *Borrelia* in these samples.

199 The specificity of the primary antibody to recognize both spiral and atypical forms of *B.*  
200 *burgdorferi* was verified by application of antibody on the paraplast sections of antibiotic-treated  
201 *B. burgdorferi* cultures mounted in agar (Supplementary Figure 1).

202

## 203 **Results**

### 204 *Patient history and Borrelia serology*

205 A male patient born in 1996, contacted a physician in 2004 after appearance of erythema migrans.  
206 He was diagnosed with LD and was treated with antibiotics (type and duration of treatment is  
207 unavailable), after which the patient suffered from neurological symptoms, mostly cognitive  
208 deficits such as "brain fog", reduced psychomotor performance, and difficulties with concentration  
209 and processing of visual and auditory stimuli. In 2017 the patient was examined in the neurology  
210 department and had a positive *Borrelia* serology test, with both, IgG and IgM anti-borrelia  
211 antibodies in serum, but a negative PCR from a lumbar puncture. In December 2017, the patient  
212 was admitted to the Psychiatric Department of the University Hospital Olomouc. His therapy  
213 started with Zyprexa (Olanzapin) and was later replaced with Brintellix (Vortioxetin). On February  
214 2018, anti-*Borrelia* antibodies were determined again in a private medical facility with borderline  
215 positivity for *Borrelia*-specific IgM and strong “++” positivity for IgG by ELISA. The ELISA  
216 results were confirmed by immunoblotting; the IgM immunoblot was positive for present OspC of  
217 *B. afzelii*, *B. garinii* and *B. burgdorferi* s.s. and the IgG immunoblot was borderline positive for  
218 VlsE of *B. afzelii*, *B. garinii* and *B. burgdorferi* s.s., and negative for p83, flagellin, BmpA, OspA,  
219 OspB, OspC and DbpA. Serological tests for *Chlamydia* sp., *Mycoplasma* sp., *Anaplasma*  
220 *phagocytophillum*, *Toxocara canis* and *Toxoplasma gondii* were negative. A PCR test for the  
221 presence of *Babesia* sp. in peripheral blood was negative. At the same private medical facility,  
222 patient was prescribed a combination of antimicrobials: Minocycline (3x100mg/day),  
223 Azithromycin 250 mg (3x/week), and Hydroxychloroquine (Plaquenil 200 mg, 1x1). In August  
224 2018, the suspected hypocorticism was ruled out by biochemical laboratory examinations. In  
225 September 2018 the patient was hospitalized at the Department of Psychiatry University Hospital

226 Olomouc with suspicion of a developing mental disorder. The patient was diagnosed with  
227 schizotypal and somatomorphic condition and was discharged three weeks later. In August 2019  
228 the patient committed suicide. The patient's body was dissected in the Institute of Forensic  
229 Medicine and Medical Law, University Hospital Olomouc 2 days after the death. The patient left  
230 behind the letter expressing the urgent demand to scientists to analyze his brain for presence of LD  
231 spirochetes. The letter was provided to the Ethical committee of University Hospital Olomouc and  
232 initiated this study.

### 233 *Post-mortem toxicology and microbiology*

234 Toxicological post-mortem analysis confirmed the presence of following chemical agents in the  
235 blood: hydroxychloroquine, hydroxyzine (the active substance in the anxiolytic Atarax) and its  
236 metabolite cetirizine. In addition, a low concentration of azithromycin was detected in CSF. This  
237 confirms that the patient was taking the prescribed combination antibiotic therapy until shortly  
238 before death. Immunoblot analyses of post-mortem serum and CSF conducted at the Faculty of  
239 Medicine and Dentistry, Palacky University Olomouc, confirmed borderline IgG reactivity against  
240 VlsE of *B. garinii* and *B. burgdorferi* s.s. The reactions with VlsE antigens of *B. afzelii*, lipids of  
241 *B. garinii* and *B. afzelii*, p83, p41, p39, OspC, p58, p21, p20, p19 and p18 were negative. Using  
242 immunoblot kits for autoantibodies detection, weak IgG positivity against PL-7 antigen (threonyl-  
243 tRNA synthetase) and borderline reactions with SRP antigen and histones were detected. As a part  
244 of the microbiological analysis of post-mortem samples, the CSF and brain tissues were used for  
245 the cultivation of spirochetes in the BSK-H medium. After 2 months of incubation of seeded  
246 cultures under conditions described above, the presence of live bacteria were not detected in any  
247 culture and all samples were deemed to be culture-negative.

248

249 **PCR detection of *Borrelia* DNA in frozen brain tissue samples**

250 To determine if *Borrelia* DNA could be detected in the brain, PCR analysis was performed on  
 251 DNA from seven different parts of the human brain, samples of which had been frozen at -80°C  
 252 upon collection. Nine genes (*flaB*, *ospC*, *clpA*, *clpX*, *nifS*, *rplB*, *pepX*, *pyrG* and *uvrA*) provided  
 253 the amplicons of the expected size (Table S1), although the PCRs were not 100% successful for  
 254 all tested brain loci ( Table 1).

255 Table 1. Results of PCR amplification of *Borrelia* genes in different brain loci

| gene<br>sample    | <i>fla B</i><br>388 bp | <i>ospC</i><br>617 bp | <i>clpA</i><br>706 bp | <i>clpX</i><br>721 bp | <i>nifS</i><br>629 bp | <i>rplB</i><br>720 bp | <i>pepX</i><br>666 bp | <i>pyrG</i><br>687 bp | <i>uvrA</i><br>677 bp |
|-------------------|------------------------|-----------------------|-----------------------|-----------------------|-----------------------|-----------------------|-----------------------|-----------------------|-----------------------|
| 1- temporal lobe  | <i>Bb</i> s.s.         | <i>Bb</i> s.s.        | +                     |                       | +                     | +                     | +                     |                       | +                     |
| 2- choroid plexus | <i>Bb</i> s.s.         |                       | +                     |                       | +                     | +                     | +                     | +                     | +                     |
| 3- occipital lobe |                        | <i>Bb</i> s.s.        | +                     |                       | +                     | +                     | +                     | +                     | +                     |
| 4- frontal lobe   | <i>Bb</i> s.s.         | <i>Bb</i> s.s.        | +                     |                       | +                     | +                     | +                     | +                     | +                     |
| 5- parietal lobe  | <i>Bb</i> s.s.         | <i>Bb</i> s.s.        | +                     | +                     | +                     | +                     | +                     | +                     | +                     |
| 6- basal ganglia  | <i>B. gar</i>          | <i>B. gar</i>         |                       |                       | +                     | +                     | +                     | +                     | +                     |
| 7- cerebellum     | <i>B. gar</i>          |                       |                       |                       |                       | +                     | +                     | +                     | +                     |

256 “+”- DNA fragment of expected size was obtained by PCR amplification

257 Sequence confirmation, followed by comparison with available databases, confirmed the presence  
 258 of DNA of two spirochete species, *B. burgdorferi* s.s and *B. garinii*. The different *Borrelia*  
 259 genospecies were differently distributed in brain samples: DNA of a single species, *B. burgdorferi*  
 260 s.s., was detected in temporal right lobe, choroid plexus (left), occipital lobe (left), frontal lobe  
 261 (left) and parietal lobe (right)), while the DNA of *B. garinii* was identified in the basal ganglia  
 262 (right) and cerebellum (right). No PCR amplification showed the presence of more than one  
 263 spirochete species in any sample.

264 BLASTN analysis of the *ospC* sequences confirmed that the *B. burgdorferi* s.s. strain carried *ospC*  
 265 of type A, the most common *ospC* type that is widely distributed globally and is considered to be

266 the most invasive type. The *B. garinii ospC* sequences detected in the brain samples were identical  
267 to strains widely distributed in Eurasia.

### 268 *Occipital lobe tissue exhibited structures consistent with Borrelia*

269 Immunohistochemical investigation of paraffin sections of the patient occipital lobe samples  
270 (Figure 1) revealed the presence of structures reactive with *Borrelia*-specific rabbit polyclonal  
271 antibodies (Figure 2). The size and morphology of these structures resembled *Borrelia* cells with  
272 the atypical morphology detected from cultured spirochetes treated with doxycycline or  
273 amoxicillin, used as an *in vitro* test of antibody specificity (see Supplementary Material and  
274 Methods and Supplementary Figure 1). In *Borrelia* populations treated by both low (50 µg/ml) and  
275 high (100 µg/ml) concentrations of either doxycycline or amoxicillin, the antibody stained both  
276 spiral and atypical *B. burgdorferi* forms (Supplementary Figure 1 A, C, E, G, I). The presence of  
277 both forms of *Borrelia* in the culture was verified using transmission electron microscopy  
278 (Supplementary Figure 1 B, D, F, H, J). The structures detected in the samples of the patient  
279 occipital lobe had a diameter of about 1-10 µm, and presumed protoplasmic cylinders ranged  
280 between 0.2 - 0.4 µm in diameter. These structures were detected with an estimated frequency of  
281 0.16 - 0.3 per 1 mm<sup>3</sup> of tissue typically located near the capillaries (Figure 2 A, B). These findings  
282 were in accordance with the observation of tissue samples from mice artificially infected with *B.*  
283 *burgdorferi* s.s. (Figure 3), where structures corresponding to the atypical forms of *Borrelia* were  
284 detected. Out of all tested mouse tissues, these *Borrelia*-like structures were mainly found in  
285 samples from bladders (Fig. 3 A, B) and knee joints (Fig. 3 C, D).

### 286 **Discussion**

287 Detection of *Borrelia* in multiple organs of infected animals, including humans, demonstrates the  
288 ability of spirochetes to disseminate into the secondary sites of infection (to review see 7 [citations

289 17-49]). Detection of intact spirochetes at the sites of secondary infection in both laboratory  
290 animals and humans after even aggressive antibiotic treatments further demonstrates the ability of  
291 the spirochetes to persist (13, to review see 7 [citations 50-85]). These previous findings are  
292 consistent with our finding of spirochetes in a human brain despite extended antibiotic treatment.  
293 Earlier presented detection of intact spirochetes in autopsy brains specimens of the human after  
294 extended treatments and these with diverse history of disease manifestations, from widely  
295 recognized neurocognitive disorder, anxiety, depression, memory loss to brain atrophy and  
296 progressive dementia (21, 36-40), might show that persistent *Borrelia* infection can lead to  
297 persistent disorder of central nervous system (CNS) (13, 41-42). Neurotropic nature of LB  
298 spirochetes secures its survival in the CNS (43) for an extended period of time in alternative  
299 morphological forms (44-46), including antibiotic-resistant biofilms (47). In general,  
300 dissemination of spirochetes occurs through the bloodstream where the spirochetes remain for a  
301 short period of time, heading finally to the extracellular matrix of varied internal organs, where  
302 they retain protection from a host immune system or antibiotics (11, 48-51). However, LB  
303 spirochetes were found to be present as well intracellularly in cardiac myocytes, endothelial or  
304 synovial cells (52-54). Dissemination of spirochetes into the CNS is thought to occur via passage  
305 along the peripheral nerves (23). Based on the distinct clinical manifestations of LNB in Europe  
306 and North America, caused by *Borrelia garinii* and *B. burgdorferi* s.s., respectively, the  
307 mechanisms of spirochete dissemination into the CNS might be species-dependent and rely on  
308 *Borrelia* ability to cross the BBB (26-27, 55).

309 Our results confirmed the presence of two species of spirochetes from *Borrelia burgdorferi* sensu  
310 lato complex, *Borrelia garinii* and *Borrelia burgdorferi* s.s., in different areas of the human brain.  
311 Importantly, the DNAs of two spirochete species were detected in distinct areas of the brain; in no

312 case did we find infection with both in the same brain region. Multiple repeated PCR  
313 amplifications with different sets of primers, followed by sequence confirmation of the *Borrelia*  
314 species, always provided clear and definite results indicating the presence of only one species.  
315 Based on the analysis of a brain from only a single individual, it is not yet possible to conclude  
316 whether this finding represents biological restriction in brain colonization or is just a coincidence.  
317 The mechanism of crossing the BBB by spirochetes is not understood yet as a good animal model  
318 has not yet been established. Recently used inbred mice as a model have shown colonization of  
319 dura mater during acute and late spirochete infection (56-57). The development of LNB depends  
320 on the ability of spirochetes to cross the BBB. This invasion can occur via breaching either physical  
321 (tight junctions) or metabolic (enzymes, transport systems) barriers (58). The role of the BBB in  
322 neurodegenerative and neuropsychiatric disorders is crucial; its failure plays an important role in  
323 the pathogenesis of many diseases of the CNS that are caused by bacteria or protozoa (59-61).  
324 Recent studies show that, in the case of some neurocognitive disorders that lead to the development  
325 of dementia, as well as during normal aging, the “leakage” of the BBB is increased (62-63).  
326 Whether *Borrelia* enter the brain by direct transmigration or are carried across the BBB hidden  
327 inside non-phagocytosing leukocytes, using the “trojan horse” mechanism as in the case of other  
328 pathogens, is not yet known (60-61). It is tempting to speculate that some kind of competition  
329 might occur between the spirochete species in the process of crossing the BBB, and this might be  
330 the basis of our observations. A recent study by Adams and colleagues (27) showed that different  
331 species of LD spirochetes are able to enter BBB-organoids with different rates of success. The  
332 spirochetes that successfully invaded the organoids remained viable inside the BBB-organoids,  
333 initiating the loss of tight junction and changes in the organoids gross morphology and integrity  
334 (27). To our knowledge, this is the first study that confirms the presence of *B. garinii* and *B.*

335 *burgdorferi* s.s. structures in the human brain with strict separation of invaded brain loci. The  
336 question of what defines the distribution of spirochete species in brain tissues remains unanswered  
337 but is one of increasing importance as the number of human *Borrelia* infections increase.  
338 The attribution of persistent symptoms to Lyme disease and potential *Borrelia* persistence is  
339 limited by several factors including presence of comorbid disease with overlapping symptoms or  
340 reinfection with *Borrelia*. For example, in the case of symptoms such as fatigue, headache, sleep  
341 disruption, cognitive malfunctions such as feeling of poor concentration, confusion, slower  
342 thinking, forgetfulness, lost words or mental fatigue, sometimes identified by patients as a “brain  
343 fog”, it is difficult to exclude the contribution of endogenous psychiatric etiology even in the case  
344 of positive laboratory proofs of previous *Borrelia* exposure. Nevertheless, the important fact  
345 remains that several months of combined antimicrobial treatment in the presented case did not lead  
346 to an improvement in this patient's condition. Human LNB is an example of a very complex  
347 disorder. Big controversy exist both in diagnosis and treatment of this disease, especially when it  
348 comes to persistent infection, chronic illness, PTLDS or the course of patients treatment with such  
349 conditions. It remains an open question whether long-term antimicrobial treatment may have  
350 contributed to the progression of neurological symptoms in reported patient. Two of the drugs he  
351 used are suspected to have neurological or neuropsychiatric side effects, namely minocycline (64-  
352 65) and hydroxychloroquine (66-68). Either long-term or repeated antibiotic therapy of PTLDS  
353 also carries a number of other risks, including development of significant, even life-threatening  
354 disorders such as necrotising enterocolitis or systemic candidiasis (69-70). Both can affect as well  
355 the finding and treating of other possible causes of the symptoms (71-72).  
356 Since the recognition of Lyme disease, thousands of reports have been published, but the optimal  
357 therapy is still a matter of debate (73). The complexity of the pathophysiology of the causative



358 agent of LD and the clinical uncertainty surrounding Lyme or other tick-borne diseases make the  
359 choice of treatment not straightforward. Recognized persistent bacterial infections may require  
360 prolonged antibiotic therapy and seem reasonable and justifiable in some situations when  
361 considering patients with persistent LD symptoms (73).

### 362 ***Acknowledgments***

363 This research was funded by grant NV19-05-00191 from Ministry of Health of the Czech  
364 Republic. Partial analysis of the samples was supported by project RVO 60077344 of the Biology  
365 Centre CAS, Institute of Entomology. We acknowledge the BC CAS core facility LEM supported  
366 by MEYS CR (LM2023050 Czech-BioImaging and OP VVV  
367 CZ.02.1.01/0.0/0.0/18\_046/0016045).

### 368 ***Institutional Review Board Statement***

369 The study was conducted according to the guidelines of the Declaration of Helsinki, and approved  
370 by the Institutional Ethics Committee of University Hospital Olomouc (reference number 102/18  
371 from June 2018). The protocol of the study, including the informed consent of the patients, was  
372 approved by the Ethics Committee of the Olomouc University Hospital (reference number 102/18  
373 of June 2018).

### 374 ***Conflicts of Interest***

375 The authors declare no conflict of interest.

### 376 ***References***

- 377 1. Steere A. 1989. Lyme disease. *N Engl J Med* 321: 586–596.
- 378 2. Barthold SW, Hodzic E, Imai DM, Feng S, Yang X, Luft BJ. 2010. Ineffectiveness of  
379 tigecycline against persistent *Borrelia burgdorferi*. *Antimicrob Agents Chemother* 54:643–651.

- 380 3. Preac-Mursic V, Weber K, Pfister HW, Wilske B, Gross B, Baumann A, Prokop J. 1989.  
381 Survival of *Borrelia burgdorferi* in antibioticly treated patients with Lyme borreliosis. Infection  
382 17: 355–359.
- 383 4. Shadick NA, Phillips CB, Logigian EL, Steere AC, Kaplan RF, Berardi VP, Duray PH,  
384 Larson MG, Wright EA, Ginsburg KS, Katz JN, Liang MH. 1994. The long-term clinical outcomes  
385 of Lyme disease. A population-based retrospective cohort study. Ann Int Med 121:560–567.
- 386 5. Fauvart M, De Groote VN, Michiels J. 2011. Role of persister cells in chronic infections:  
387 clinical relevance and perspectives on anti-persister therapies. J Med Microbiol 60(Pt 6):699–709.
- 388 6. Nemeth J, Bernasconi E, Heininger U, Abbas M, Nadal D, Strahm C, Erb S, Zimmerli S,  
389 Furrer H, Delaloye J, Kuntzer T, Altpeter E, Sturzenegger M, Weber R. 2016. Update of the Swiss  
390 guidelines on post-treatment Lyme disease syndrome. Swiss Med Wkly 146:w14353. doi:  
391 10.4414/smw.2016.14353
- 392 7. Rudenko N, Golovchenko M, Kybicova K, Vancova M. Metamorphoses of Lyme disease  
393 spirochetes: phenomenon of *Borrelia* persists. Parasites Vectors 12:237. doi: 10.1186/s13071-  
394 019-3495-7
- 395 8. Sloupenska K, Koubkova B, Horak P, Hutyrova B, Racansky M, Mares J, Miklusova M,  
396 Schovanek J, Zapletalova J, Raska M, Krupka M. 2023. Myositis autoantibodies in patients with  
397 suspected post-treatment Lyme disease syndrome. Life (Basel) 13:527. doi: 10.3390/life13020527
- 398 9. Straubinger RK, Straubinger AF, Jacobson RH, Chang Y, Summers BA, Erb HN, Appel  
399 MJG. 1997. Two lessons from the canine model of Lyme disease: migration of *Borrelia*

- 400 *burgdorferi* in tissues and persistence after antibiotic treatment. J Spirochetal Tick Borne Dis 4:24–  
401 31.
- 402 10. Petzke M, Schwartz I. 2015. *Borrelia burgdorferi* pathogenesis and the immune response.  
403 Clin Lab Med 35:745–764.
- 404 11. Tsao JI. 2009. Reviewing molecular adaptations of Lyme borreliosis spirochetes in the  
405 context of reproductive fitness in natural transmission cycles. Vet Res 40:2.  
406 [ff10.1051/vetres/2009019](https://doi.org/10.1051/vetres/2009019)
- 407 12. Hyde JA. 2017. *Borrelia burgdorferi* keeps moving and carries on: a review of borrelial  
408 dissemination and invasion. Front Immunol, sec. Microb Immunol, 8:114. doi:  
409 [10.3389/fimmu.2017.00114](https://doi.org/10.3389/fimmu.2017.00114)
- 410 13. Gadila SKG, Rosoklija G, Dwork AJ, Fallon BA, Embers ME. 2021. Detecting borrelia  
411 spirochetes: a case study with validation among autopsy specimens. Front Neurol 12:628045. doi:  
412 [10.3389/fneur.2021.628045](https://doi.org/10.3389/fneur.2021.628045)
- 413 14. Hodzic E, Feng S, Holden K, Freet KJ, Barthold SW. 2008. Persistence of *Borrelia*  
414 *burgdorferi* following antibiotic treatment in mice. Antimicrob Agents Chemother 52:1728–1736.
- 415 15. Hodzic E, Imai D, Feng S, Barthold SW. 2014. Resurgence of persisting noncultivable  
416 *Borrelia burgdorferi* following antibiotic treatment in mice. PLoS ONE 9:e86907. doi:  
417 [10.1371/journal.pone.0086907](https://doi.org/10.1371/journal.pone.0086907)
- 418 16. Straubinger RK, Summers BA, Chang YF, Appel MJ. 1997. Persistence of *Borrelia*  
419 *burgdorferi* in experimentally infected dogs after antibiotic treatment. J Clin Microbiol 35:111–  
420 116.

- 421 17. Embers ME, Barthold SW, Borda JT, Bowers L, Doyle L, Hodzic E, Jacobs MB,  
422 Hasenkampf NR, Martin DS, Narasimhan S, Phillippi-Falkenstein KM, Purcell JE, Ratterree MS,  
423 Philipp MT. 2012. Persistence of *Borrelia burgdorferi* in rhesus macaques following antibiotic  
424 treatment of disseminated infection. PLoS ONE 7:e29914. doi: 10.1371/journal.pone.0029914
- 425 18. Rizzoli A, Hauffe HC, Carpi G, Voure'h GI, Neteler M, Rosà R. 2011. Lyme borreliosis  
426 in Europe. Euro Surveill 16(27):pii=19906. <https://doi.org/10.2807/ese.16.27.19906-en>
- 427 19. Hubálek. Z. 2009. Epidemiology of lyme borreliosis, p 31–50. In Lipsker D, Jaulhac B  
428 (ed), Lyme Borreliosis, Curr Probl Dermatol vol 37. Basel, Karger.
- 429 20. Janson CG. 2016. Blocking *Borrelia* in the brain. Sci Transl Med 8, 324: 324ec18. doi:  
430 10.1126/scitranslmed.aaf2005
- 431 21. Miklossy J, Khalili K, Gern L, Ericson RL, Darekar P, Bolle L, Hurlimann J, Paster BJ.  
432 2004. *Borrelia burgdorferi* persists in the brain in chronic Lyme neuroborreliosis and may be  
433 associated with Alzheimer disease. J Alzheimers Dis 6:639–649.
- 434 22. Miklossy J, Kis A, Radenovic A, Miller L, Forro L, Martins R, Reiss K, Darbinian N,  
435 Darekar P, Mihaly L, Khalili K. 2006. Beta-amyloid deposition and Alzheimer's type changes  
436 induced by *Borrelia* spirochetes. Neurobiol Aging 27:228–236.
- 437 23. Miklossy J, Kasas S, Zurn AD, McCall Sh, Yu Sh, McGeer PL. 2008. Persisting atypical  
438 and cystic forms of *Borrelia burgdorferi* and local inflammation in Lyme neuroborreliosis. J  
439 Neuroinflammation 5:40. doi:10.1186/1742-2094-5-40
- 440 24. Piesman J, Gern L. 2004. Lyme borreliosis in Europe and North America. Parasitology  
441 129:S191–S220.

- 442 25. Rudenko N, Golovchenko M, Grubhoffer L, Oliver JH Jr. 2011. Updates on *Borrelia*  
443 *burgdorferi* sensu lato complex with respect to public health. *Ticks Tick Borne Dis* 2:123–128.
- 444 26. Garcia-Monco JC, Benach JL. 2019. Lyme neuroborreliosis: clinical outcomes,  
445 controversy, pathogenesis, and polymicrobial infections. *Ann Neurol* 85:21–31.
- 446 27. Adams Y, Clausen AS, Jensen PØ, Lager M, Wilhelmsson P, Henningson AJ, Lindgren P-  
447 E, Faurholt-Jepsen D, Mens H, Kraiczy P, Kragh KN, Bjarnsholt T, Kjaer A, Lebech A-M, Jensen  
448 AR. 2023. 3D blood-brain barrier-organoids as a model for Lyme neuroborreliosis highlighting  
449 genospecies dependent organotropism. *iScience* 26, 1:105838. doi: 10.1016/j.isci.2022.105838
- 450 28. Embers ME, Hasenkampf NR, Jacobs MB, Tardo AC, Doyle-Meyers LA, Philipp MT,  
451 Hodzic M. Variable manifestations, diverse seroreactivity and post-treatment persistence in non-  
452 human primates exposed to *Borrelia burgdorferi* by tick feeding. 2017. *PLoS ONE*. 12:e0189071.  
453 doi: 10.1371/journal.pone.0189071
- 454 29. Margos G, Gatewood AG, Aanensen DM, Hanincová K, Terekhova D, Vollmer SA,  
455 Cornet M, Piesman J, Donaghy M, Bormane A, Hurn MA, Feil EJ, Fish D, Casjens S, Wormser  
456 GP, Schwartz I, Kurtenbach K. 2008. MLST of housekeeping genes captures geographic  
457 population structure and suggests a European origin of *Borrelia burgdorferi*. *Proc Natl Acad Sci*  
458 *USA* 105:8730–8735.
- 459 30. Golovchenko M, Sima R, Hajdusek O, Grubhoffer L, Oliver JH Jr, Rudenko N. 2014.  
460 Invasive potential of *Borrelia burgdorferi* sensu stricto *ospC* type L strains increases the possible  
461 disease risk to humans in the regions of their distribution. *Parasites Vectors*, 7:538. doi:  
462 10.1186/s13071-014-0538-y

- 463 31. Rudenko N, Golovchenko M, Vancova M, Clark K, Grubhoffer L, Oliver JH Jr. 2016.  
464 Isolation of live *Borrelia burgdorferi* sensu lato spirochaetes from patients with undefined  
465 disorders and symptoms not typical for Lyme borreliosis. Clin Microbiol Infect 22:267.e9–15.
- 466 32. Bunikis J, Garpmo U, Tsao J, Berglund J, Fish D, Barbour AG. 2004. Sequence typing  
467 reveals extensive strain diversity of the Lyme borreliosis agents *Borrelia burgdorferi* in North  
468 America and *Borrelia afzelii* in Europe. Microbiology 150(Pt 6):1741–1755.
- 469 33. Clark K, Hendricks A, Burge D. 2005. Molecular Identification and analysis of *Borrelia*  
470 *burgdorferi* sensu lato in lizards in the Southeastern United States. Appl Environ Microbiol  
471 71:2616–2625.
- 472 34. Levine JD, Sauman I, Imbalzano M, Reppert SM, Jackson FR. 1995. Period protein from  
473 the giant silkworm *Antheraea pernyi* functions as a circadian clock element in *Drosophila*  
474 *melanogaster*. Neuron 15:147–157.
- 475 35. Schindelin J, Arganda-Carreras I, Frise E, Kaynig V, Longair M, Pietzsch T, Preibisch S,  
476 Rueden C, Saalfeld S, Schmid B, Tinevez JY, White DJ, Hartenstein V, Eliceiri K, Tomancak P,  
477 Cardona A. 2012. Fiji: an open-source platform for biological-image analysis. Nat Methods  
478 9:676–682.
- 479 36. MacDonald AB. 1986. *Borrelia* in the brains of patients dying with dementia. JAMA  
480 256:2195–2196.
- 481 37. Fallon BA, Nields JA. 1994. Lyme disease: A neuropsychiatric illness. Am J Psychiatry  
482 151:1571–1583.

- 483 38. Miklossy J. 2008. Biology and neuropathology of dementia in syphilis and Lyme disease.  
484 Handb Clin Neurol 89:825–844.
- 485 39. Blanc F, Philippi N, Cretin B, Kleitz C, Berly L, Jung B, Kremer S, Namer IJ, Sellal F,  
486 Jaulhauc B, de Seze J. 2014. Lyme neuroborreliosis and dementia. J Alzheimers Dis 41:1087–  
487 1093.
- 488 40. Kristoferitsch W, Aboulenein-Djamshidian F, Jecel J, Rauschka H, Rainer M, Stanek G,  
489 Fischer P. 2018. Secondary dementia due to Lyme neuroborreliosis. Wien KlinWochenschr  
490 130:468–478.
- 491 41. Garcia-Toro M, Aguirre I. 2007. Biopsychosocial model in depression revisited. Med  
492 Hypotheses 68:683–691.
- 493 42. Senejani AG, Maghsoudlou J, El-Zohiry D, Gaur G, Wawrzeniak K, Caravaglia C, Khatri  
494 VA, MacDonald A, Sapi E. 2022. *Borrelia burgdorferi* co-localizing with amyloid markers in  
495 Alzheimer's disease brain tissues. J Alzheimers Dis 85:889–903.
- 496 43. Hansen K, Lebec A-M. 1992. The clinical and epidemiological profile of Lyme  
497 neuroborreliosis in Denmark 1985-1990: a prospective study of 187 patients with *Borrelia*  
498 *burgdorferi* specific intrathecal antibody production. Brain 115:399–423.
- 499 44. MacDonald AB. 2006. Spirochetal cyst forms in neurodegenerative disorders,... hiding in  
500 plain sight. Med Hypotheses 67:819–832.
- 501 45. Gruntar I, Malovrh T, Murgia R, Cinco M. 2001. Conversion of *Borrelia garinii* cystic  
502 forms to motile spirochetes in vivo. APMIS 109:383–388.

- 503 46. Murgia R, Cinco M. 2004. Induction of cystic forms by different stress conditions in  
504 *Borrelia burgdorferi*. *APMIS* 112:57–62.
- 505 47. Sapi E, Kasliwala RS, Ismail H, Torres JP, Oldakowski M, Markland S, Gaur G, Melillo  
506 A, Eisendle K, Liegner KB, Libien J, Goldman JE. 2019. The long-term persistence of *Borrelia*  
507 *burgdorferi* antigens and DNA in the tissues of a patient with Lyme disease. *Antibiotics* (Basel)  
508 8:183. doi: 10.3390/antibiotics8040183
- 509 48. Cabello FC, Godfrey HP, Newman SA. 2007. Hidden in plain sight: *Borrelia burgdorferi*  
510 and the extracellular matrix. *Trends Microbiol* 15:350–354.
- 511 49. Tilly K, Rosa PA, Stewart PE. 2008. Biology of infection with *Borrelia burgdorferi*. *Infect*  
512 *Dis Clin North Am* 22:217–234.
- 513 50. Liang FT, Brown EL, Wang T, Iozzo RV, Fikrig E. 2004. Protective niche for *Borrelia*  
514 *burgdorferi* to evade humoral immunity. *Am J Pathol* 165:977–985.
- 515 51. Nordstrand A, Barbour A, Bergstrom S. 2000. *Borrelia* pathogenesis research in the post-  
516 genomic and post-vaccine era. *Curr Opin Microbiol* 3:36–92.
- 517 52. Ma Y, Sturrock A, Weis J. 1991. Intracellular localization of *Borrelia burgdorferi* within  
518 human endothelial cell. *Infect Immun* 59:671–678.
- 519 53. Pachner A, Basta J, Delaney E, Hulinska D. 1995. Localisation of *Borrelia burgdorferi* in  
520 murine Lyme borreliosis by electron microscopy. *Am J Trop Med Hyg* 52:128–133.
- 521 54. Girschick HJ, Huppertz HI, Rüssmann H, Krenn V, Karch H. 2008. Intracellular  
522 persistence of *Borrelia burgdorferi* in human synovial cells. *Rheumatol Int* 16:125–132.



- 523 55. Rupprecht TA, Koedel U, Fingerle V, Pfister H-W. 2008. The pathogenesis of Lyme  
524 neuroborreliosis: from infection to inflammation. *Mol Med* 14:205–212.
- 525 56. Casselli T, Divan A, Vomhof-DeKrey EE, Tourand Y, Pecoraro HL, Brissette CA. 2021.  
526 A murine model of Lyme disease demonstrates that *Borrelia burgdorferi* colonizes the dura mater  
527 and induces inflammation in the central nervous system. *PLoS Pathog* 17(2):e1009256 e1009256.  
528 doi: 10.1371/journal.ppat.1009256
- 529 57. Divan A, Casselli T, Narayanan SA, Mukherjee S, Zawieja DC, Watt JA, Brissette CA,  
530 Newell-Rogers MK. 2018. *Borrelia burgdorferi* adhere to blood vessels in the dura mater and are  
531 associated with increased meningeal T cells during murine disseminated borreliosis. *PLoS One*  
532 13, e0196893. doi: 10.1371/journal.pone.0196893
- 533 58. Persidsky Y, Ramirez SH, Haorah J, Kanmogne GD. 2006. Blood–brain barrier: structural  
534 components and function under physiologic and pathologic conditions. *J Neuroimmune Pharm*  
535 1:223–236.
- 536 59. Dupin N, Lecuyer H, Carlotti A, Poyart C, Coureuil M, Chanal J, Schmitt A, Vacher-  
537 Lavenu M-C, Taha M-K, Nassif X, Morand P. 2012. Chronic meningococemia cutaneous lesions  
538 involve meningococcal perivascular invasion through the remodeling of endothelial barriers. *Clin*  
539 *Infect Dis* 54:1162–1165.
- 540 60. Adams Y, Olsen RW, Bengtsson A, Dalgaard N, Zdioruk M, Satpath, S, Behera PK, Sahu  
541 PK, Lawler SE, Qvortrup K, Wassmer SC, Jensen ATR. 2021. Plasmodium falciparum erythrocyte  
542 membrane protein 1 variants induce cell swelling and disrupt the blood–brain barrier in cerebral  
543 malaria. *J Exp Med* 218:e20201266. doi: 10.1084/jem.20201266

- 544 61. Disson O, Lecuit M. 2012. Targeting of the central nervous system by *Listeria*  
545 *monocytogenes*. *Virulence* 3:213–221.
- 546 62. Hussain B, Fang C, Chang J. 2021. Blood–brain barrier breakdown: an emerging  
547 biomarker of cognitive impairment in normal aging and dementia. *Front. Neurosci* 15: 688090.  
548 doi: 10.3389/fnins.2021.688090
- 549 63. Al-Bachari S, Naish JH, Parker GJM, Emsley HCA, Parkes LM. 2020. Blood–brain barrier  
550 leakage is increased in Parkinson’s disease. *Front Physiol* 11:593026. doi:  
551 10.3389/fphys.2020.593026
- 552 64. Shamout Y, Sigal A, Litvinov IV. 2019. Minocycline-induced transient depersonalization:  
553 A case report. *Case Reports SAGE Open Med Case Rep* 7:2050313X18823827. doi:  
554 10.1177/2050313X18823827
- 555 65. Winn BJ, Liao YJ, Horton JC. 2007. Intracranial pressure returns to normal about a month  
556 after stopping tetracycline antibiotics. *Case Reports Arch Ophthalmol* 125:1137–1138.
- 557 66. Costanza A, Placenti V, Amerio A, Aguglia A, Serafini G, Amore M, Macchiarulo E,  
558 Branca F, Merli R, Bondolfi G, Nguyen KD. 2021. Chloroquine/hydroxychloroquine use and  
559 suicide risk: hypotheses for confluent etiopathogenetic mechanisms? *Case Reports Behav Sci*  
560 (Basel). 11:154. doi: 10.3390/bs11110154
- 561 67. Garcia P, Revet A, Yroni A, Rousseau V, Degboe Y, Montastruc F. 2020. Psychiatric  
562 disorders and hydroxychloroquine for coronavirus disease 2019 (COVID-19): A VigiBase study.  
563 *Drug Saf* 43:1315–1322.

- 564 68. Emmanuel S, Östlundh L. 2020. Psychiatric adverse events with hydroxychloroquine  
565 during COVID-19 pandemic. Case Reports Asian J Psychiatr 54:102203. doi:  
566 10.1016/j.ajp.2020.102203
- 567 69. Marzec NS, Nelson C, Waldron PR, Blackburn BG, Hosain S, Greenhow T, Green GM,  
568 Lomen-Hoerth C, Golden M, Mead PS. 2017. Serious bacterial infections acquired during  
569 treatment of patients given a diagnosis of chronic Lyme disease - United States. Case Reports  
570 MMWR Morb Mortal Wkly Rep 66:607–609.
- 571 70. Patel R, Grogg KL, Edwards WD, Wright AJ, Schwenk NM. 2000. Death from  
572 inappropriate therapy for Lyme disease. Case Reports Clin Infect Dis 31:1107–1109.
- 573 71. Strizova Z, Patek O, Vitova L, Horackova M, Bartunkova J. 2019. Internet-based self-  
574 diagnosis of Lyme disease caused death in a young woman with systemic lupus erythematosus.  
575 Case Reports Joint Bone Spine 86:650–651.
- 576 72. Nelson C, Elmendorf S, Mead P. 2015. Neoplasms misdiagnosed as "chronic Lyme  
577 disease". Case Reports JAMA Intern Med 175:132–133.
- 578 73. Stricker RB. 2007. Counterpoint: Long-term antibiotic therapy improves persistent symptoms  
579 associated with Lyme disease. Clin Infect Dis 45:149–157.
- 580 74. Preac-Mursic V, Wilske B, Schierz G. 1986. European *Borrelia burgdorferi* isolated from  
581 humans and ticks. Culture conditions and antibiotic susceptibility. Zentralbl Bakteriolog Mikrobiol  
582 Hyg 263:112–118.
- 583
- 584

585 **Figures**

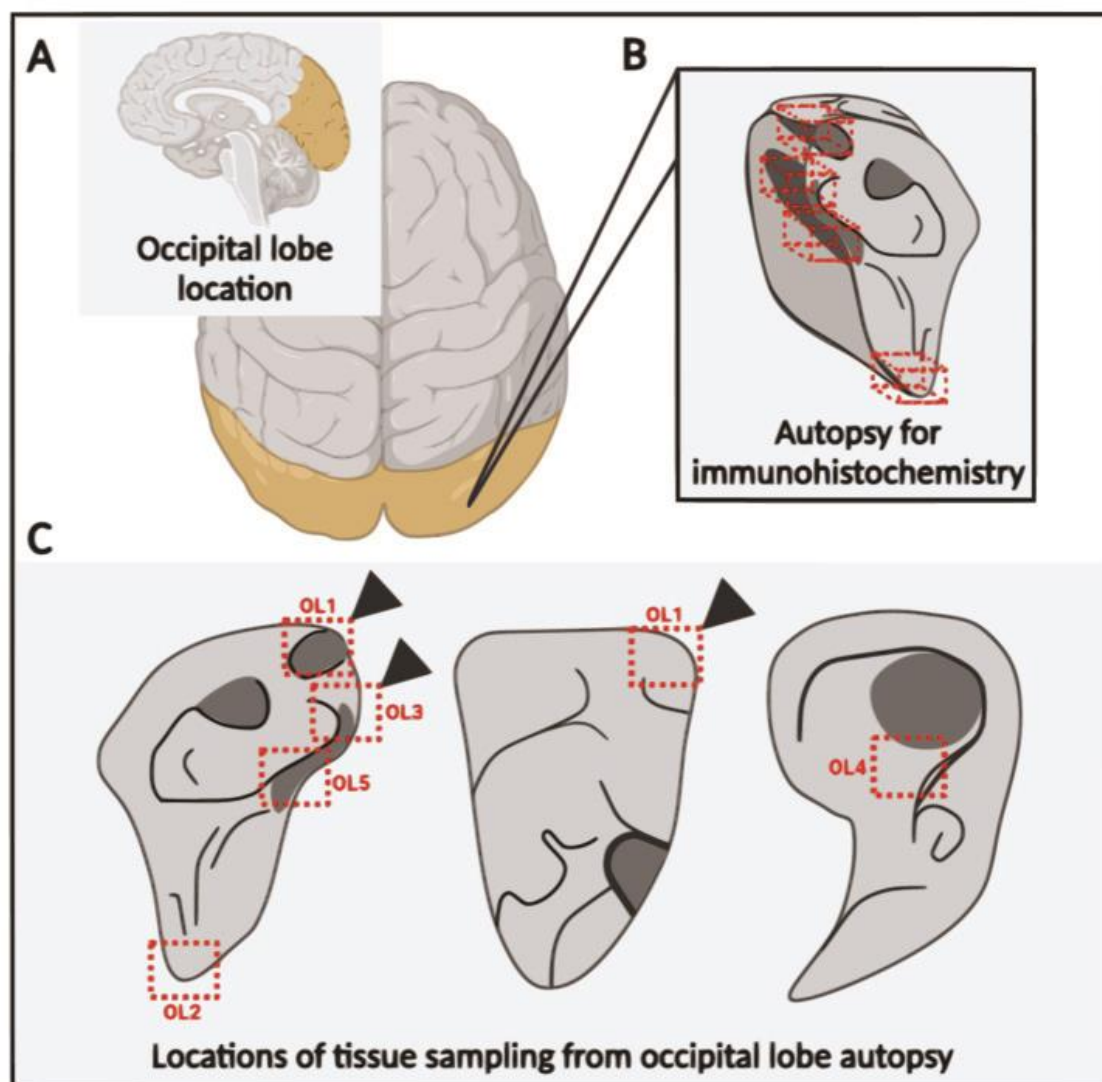

586

Figure 1. The scheme of the occipital lobe autopsy with description of sampling for the immunohistochemistry detection. (A) Location of the occipital lobe (yellow) in the human brain. (B) The model of the collected autopsy with dimensions (6x4x2 cm, approximately). (C) The red boxes and cubes indicate five screening sites of about 125 mm<sup>3</sup> used for the immunohistochemical investigation. Arrowheads point to the locations where a positive signal was found.

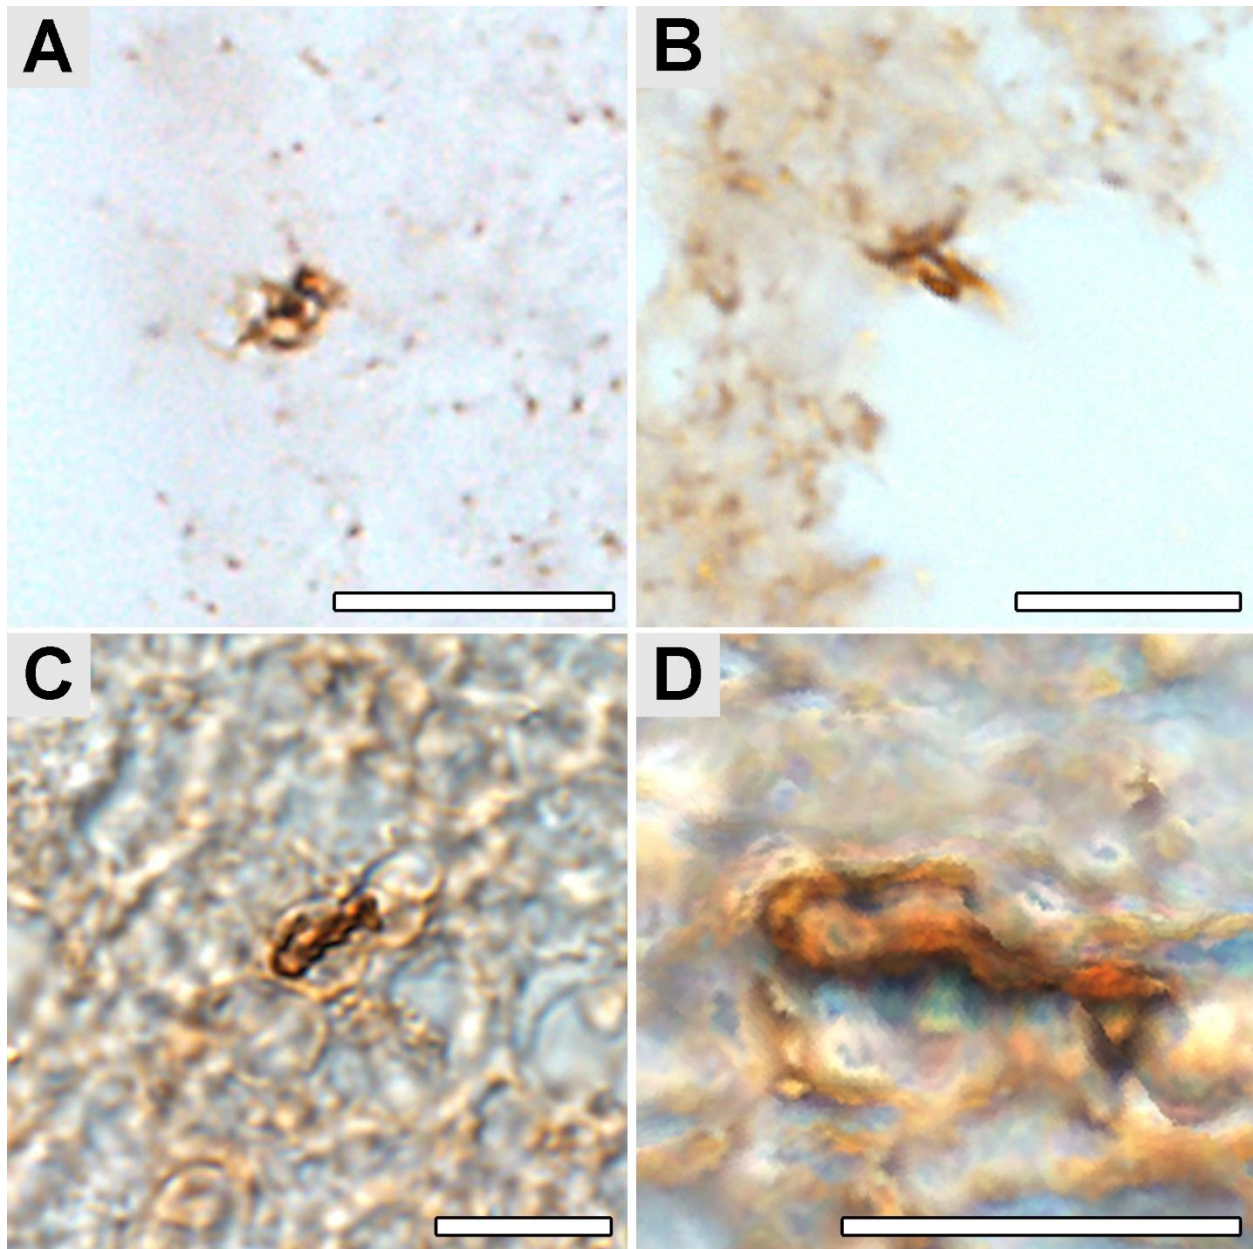

587

Figure 2. *Borrelia*-like structures in the paraplast section of a sample from the patient's occipital lobe. Anti-*B. burgdorferi* polyclonal antibody visualized by the horseradish peroxidase -conjugated secondary antibody was used for the detection. (A-C) Images from a light microscope showing structures resembling atypical forms of *Borrelia*. (D) The image C edited by image analysis in the FIJI software. Scale bar: 10 $\mu$ m.

588

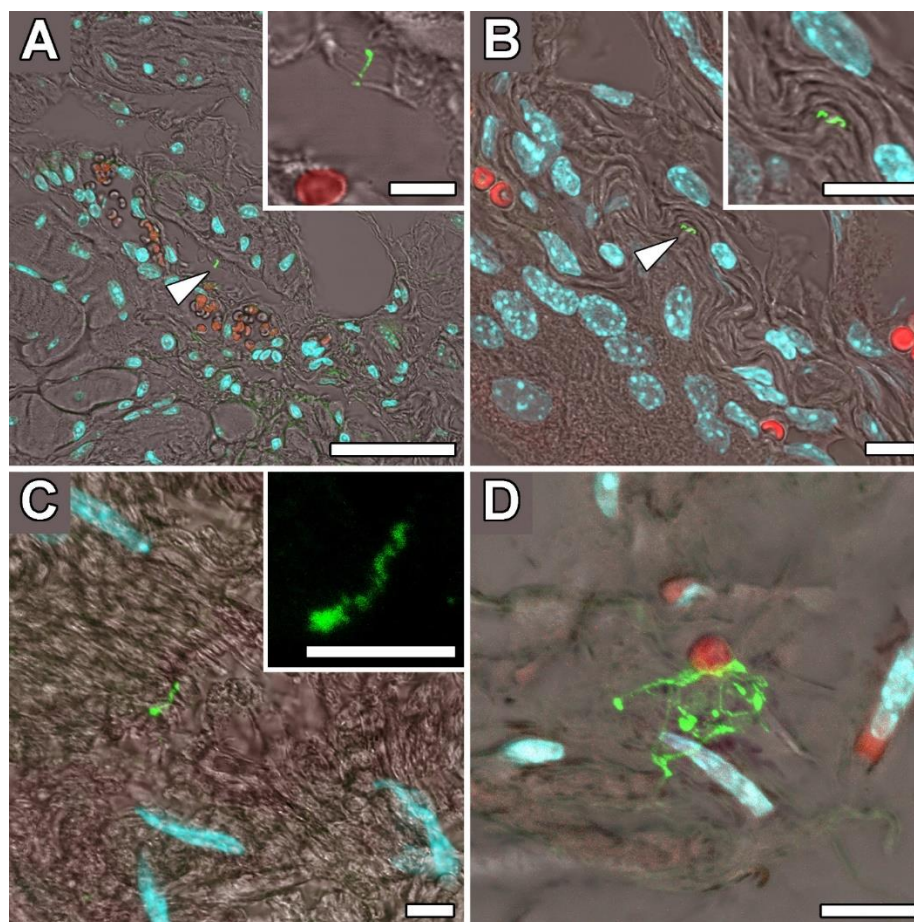

589

Figure 3. Laser scanning confocal images of detected *B. burgdorferi* sensu stricto in paraplast tissues sections of the C3H/HeN mouse line treated with doxycycline or amoxicillin. (A, B) Persistent form of *Borrelia* in the bladder (arrowheads). (C, D) Persistent form of *Borrelia* in the knee joint. Insets show close-up views of atypical forms of *Borrelia*. *Borrelia* detected by anti-*B. burgdorferi* polyclonal antibody and visualized by fluorescently labeled secondary antibody (Alexa Fluor 488), nuclei stained by DAPI (in blue), and autofluorescence of erythrocytes (in red). Scale bar: A 100  $\mu\text{m}$ , B, C, D, and insets 10  $\mu\text{m}$ .

590

## 591 **Supplementary Material and Methods**

### 592 *Induction of formation of atypical morphologies of Borrelia by antibiotics*

593 Spirochetes of *B. burgdorferi* s.s. strain NE-5264 were grown in modified Kelly-Pettenkofer  
594 medium (MKP) (74). The cultures were incubated at 33°C until cell density reached at least 10<sup>6</sup>  
595 spirochetes per milliliter. The absence of contamination and the viability of spirochetes was  
596 verified by microscopy. The spirochete concentration was determined using a Petroff-Hausser  
597 counting chamber. Five sterile DNase-free Eppendorf tubes with spirochete cultures were treated  
598 with antibiotics doxycycline or amoxicillin (Sigma-Aldrich, USA) regularly used in the treatment  
599 of LD. Each antibiotic was applied at two concentrations: 50 µg/ml and 100 µg/ml. An untreated  
600 culture was used as a positive control. After 14 days of antibiotic treatment, the spirochetes (7.5 ×  
601 10<sup>7</sup>) were washed in 0.1 M HEPES, pelleted by centrifugation (820 × g, 10 min), fixed in 4%  
602 formaldehyde with 0.1% glutaraldehyde in 0.1M HEPES for 1h at RT and immediately transferred  
603 to freshly prepared 2% agar for processing of paraplast sections.

### 604 *Infection of laboratory mice (control)*

605 Susceptible to *Borrelia* mice C3H/HeN genotype were used as laboratory animal model for control  
606 experiments. Six weeks old female mice (Jackson Laboratory, Germany) were infected by  
607 simultaneous subcutaneous and intraperitoneal injections of 10<sup>4</sup> replicating spirochetes in 100 µl  
608 of MKP medium per mouse.

### 609 *Immunohistochemical detection of cultured Borrelia*

610 Immunodetection of *Borrelia* on paraplast sections of cultured spirochetes was performed using  
611 the same protocol as for human brain tissue (above). A specifically bound primary antibody was  
612 detected by incubation with the goat anti-rabbit IgG conjugated Alexa Fluor 488 secondary

613 antibody (Life Technologies, USA), diluted 1: 500 in the blocking solution, for 90 minutes at RT  
614 in dark.

### 615 *DNA extraction*

616 For total DNA purification from all collected samples, the DNeasy Blood and Tissue kit (Qiagen,  
617 Germany) were used. To increase DNA yield and so the possibility of capture of spirochete DNA  
618 in the sample, the entire frozen tissue was weighted, homogenized in liquid nitrogen and then  
619 subsequently processed according to the manufacturer's protocol.

### 620 *Sequencing*

621 All amplicons of the expected sizes were excised from agarose gels, purified using QIAquick PCR  
622 Purification Kit (QIAGEN, Germany) and sequenced in both directions using the same primers  
623 used for amplification. Sequence analysis was performed commercially by SEQme s.r.o. (Czech  
624 Republic) and the sequences were compared to those available in the NCBI GenBan database using  
625 Basic Local Alignment Tool (BLASTn) analysis.

### 626 *Cultivation of Borrelia from CSF samples*

627 Five hundred microliters of CSF were transferred to a 5 ml of Barbour-Stoner-Kelly culture  
628 medium (BioConcept, Switzerland) supplemented with 6% rabbit serum (Merck, USA) and  
629 antibiotics phosphomycin, polymyxin and rifampicin (100x concentrated solution, HiMedia, India  
630 diluted 1:100). Seeded cultures were kept at +33°C for two months with regular checks by dark-  
631 field microscopy, starting from day 10 after culture initiation.

### 632 *Transmission electron microscopy*

633 Spirochetes were fixed in 2.5% glutaraldehyde in 0.1M PBS for 1h at RT. Cells were washed three  
634 times in 0.1 M PBS with 4% glucose, embedded into 2% of agar, and postfixated in 2% OsO<sub>4</sub> for  
635 1h at RT. After washing, samples were dehydrated stepwise using a graded acetone series (30-50-



636 70-80-90-95%, v/v) for 15 min at each step and transferred to absolute acetone for 15 min. Samples  
637 were infiltrated in 2:1, 1:1, and 1:2 mixtures from acetone/stock resin solutions (1h/each step) and  
638 finally in two changes of Poly/Bed 812 resin (Polysciences Inc., USA) before embedding and  
639 polymerization. Ultrathin sections were stained in saturated ethanolic uranyl acetate and lead  
640 citrate before imaging in JEM-1400 Flash TEM (JEOL Ltd.).

641

642

643

644

645

646

647

648

649

650

651

652

653

654

655 **Supplementary Figure 1.**

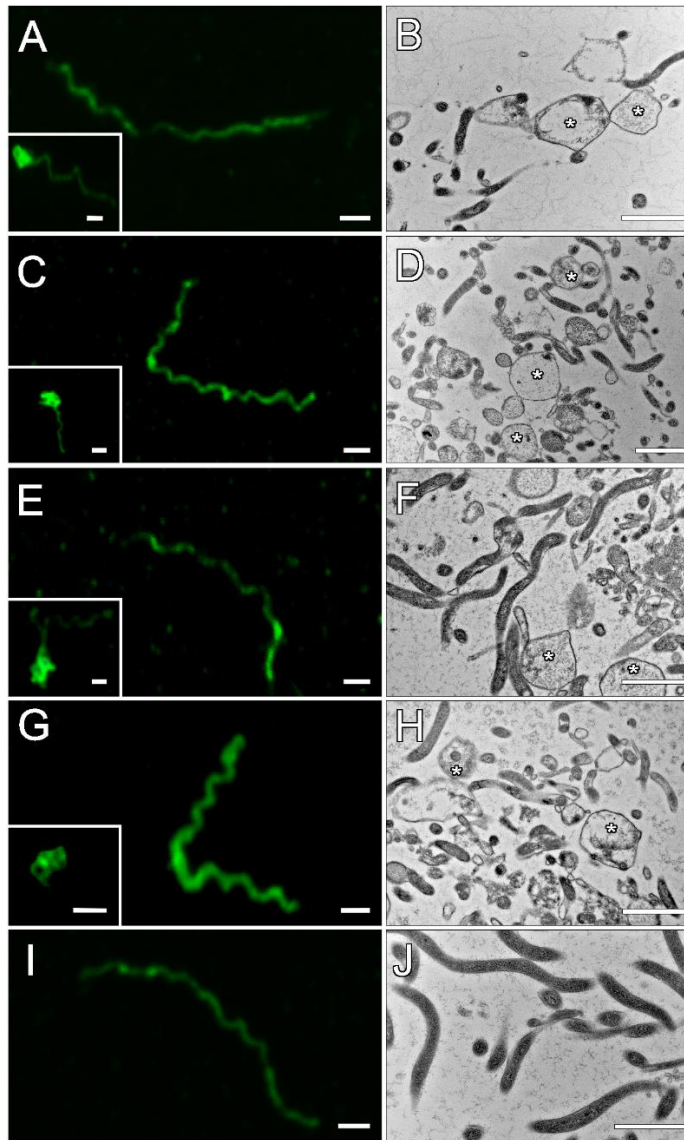

656

657 Supplementary Figure 1. Spiral and atypical *Borrelia* forms detected after antibiotics treatment.

658 Immunofluorescence and TEM images of *Borrelia burgdorferi* s.s. cultured with amoxicillin (A-

659 D) and doxycycline (E-H) antibiotics at concentrations of 50 µg/ml (A,B, E,F) and 100 µg/ml

660 (C,D,G,H). Both spiral and atypical morphological forms were observed in ATB-treated cultures

661 in contrast to control (I, J). Scale: 1 µm.

662

663 **Supplementary Table S1**

| Target           | Primer | GenBank accession number | 5' – 3' nucleotide sequence    | Position 5' (nt)* | Reference           |
|------------------|--------|--------------------------|--------------------------------|-------------------|---------------------|
| <i>ospC</i>      | F1 Ext | U01894                   | ATGAAAAAGAATACATTAAGTGC        | 306               | Bunikis et al. 2004 |
|                  | R1 Ext |                          | ATTAATCTTATAATATTGATTTAATTAAGG | 933               |                     |
|                  | F2 Int |                          | TATTAATGACTTTATTTTATTTATATCT   | 331               |                     |
|                  | R2 Int |                          | TTGATTTTAATTAAGGTTTTTTTGG      | 924               |                     |
| <i>flagellin</i> | F1 Ext | X15661                   | AARGAATTGGCAGTTCAATC           | 271               | Clark et al. (2005) |
|                  | R1 Ext |                          | GCATTTTCWATTTTAGCAAGTGATG      | 767               |                     |
|                  | F2 Int |                          | ACATATTCAGATGCAGACAGAGGTTCTA   | 301               |                     |
|                  | R2 Int |                          | GAAGGTGCTGTAGCAGGTGCTGGCTGT    | 663               |                     |
| <i>clpA</i>      | F1 Ext | BB0369                   | GATAGATTTCTCCAGACAAAG          | 1240              | Margos et al. 2008  |
|                  | R1 Ext |                          | TTCATCTATTAAGCTTTCCC           | 2214              |                     |
|                  | F2 Int |                          | GACAAAGCTTTTGATATTTAG          | 1255              |                     |
|                  | R2 Int |                          | CAAAAAAAAAACATCAAATTTTCTATCTC  | 2104              |                     |
| <i>clpX</i>      | F1 Ext | BB0612                   | GCTGCAGAGATGAATGTGCC           | 391               | Margos et al. 2008  |
|                  | R1 Ext |                          | GATTGATTTTCATATAACTCTTTTG      | 1273              |                     |
|                  | F2 Int |                          | AATGTGCCATTTGCAATAGC           | 403               |                     |
|                  | R2 Int |                          | TTAAGAAGACCCCTCTAAAATAG        | 1124              |                     |
| <i>pyrG</i>      | F1 Ext | BB0575                   | GATTGCAAGTTCTGAGAATA           | 391               | Margos et al. 2008  |
|                  | R1 Ext |                          | CAAACATTACGAGCAAATTC           | 1190              |                     |
|                  | F2 Int |                          | GATATGGAAAATATTTTATTTATTG      | 448               |                     |
|                  | R2 Int |                          | AAACCAAGACAAATTCCAAG           | 1154              |                     |
| <i>uvrA</i>      | F1 Ext | BB0837                   | GAAATTTTAAAGGAAATTAAGTAG       | 1408              | Margos et al. 2008  |
|                  | R1 Ext |                          | CAAGGAACAAAAACATCTGG           | 2318              |                     |
|                  | F2 Int |                          | GCTTAAATTTTAAATTGATGTTGG       | 1434              |                     |
|                  | R2 Int |                          | CCTATTGGTTTTTGATTTATTG         | 2111              |                     |
| <i>pepX</i>      | F1 Ext | BB0627                   | ACAGAGACTTAAGCTTAGCAG          | 362               | Margos et al. 2008  |
|                  | R1 Ext |                          | GTTCCAATGTCAATAGTTTC           | 1172              |                     |
|                  | F2 Int |                          | TTATTCCAAACCTTGCAATCC          | 449               |                     |
|                  | R2 Int |                          | TGTGCCTGAAGGAACATTTG           | 1115              |                     |
| <i>recG</i>      | F1 Ext | BB0581                   | CCCTTGTTGCCTTGCTTTC            | 890               | Margos et al. 2008  |
|                  | R1 Ext |                          | GAAAGTCCAAAACGCTCAG            | 1694              |                     |
|                  | F2 Int |                          | CTTTAATTGAAGCTGGATATC          | 917               |                     |
|                  | R2 Int |                          | CAAGTTGCATTTGGACAATC           | 1658              |                     |
| <i>rplB</i>      | F1 Ext | BB0481                   | TGGGTATTAAGACTTATAAGC          | 2                 | Margos et al, 2008  |
|                  | R1 Ext |                          | GCTGTCCCCAAGGAGACA             | 760               |                     |
|                  | F2 Int |                          | CGCTATAAGACGACTTTATC           | 40                |                     |
|                  | R2 Int |                          | GCTGTCCCCAAGGAGACA             | 760               |                     |
| <i>nifS</i>      | F1 Ext | BB0084                   | ATGGATTTCAAACAAATAAAAAAG       | 1                 | Margos et al. 2008  |
|                  | R1 Ext |                          | GATATTATTGAATTTCTTTTAAAG       | 719               |                     |
|                  | F2 Int |                          | ATGGATTTCAAACAAATAAAAAAG       | 1                 |                     |
|                  | R2 Int |                          | GTTGGAGCAAGCATTTTATG           | 680               |                     |
